# Supplementary material for: Phage–Bacterial Interaction Alters Phenotypes Associated with Virulence in Acinetobacter baumannii
Source: MDPI journal article supplement (doi:10.3390/v16050743), 2024-05-08
Supplement: s1 [file s1]

(A)

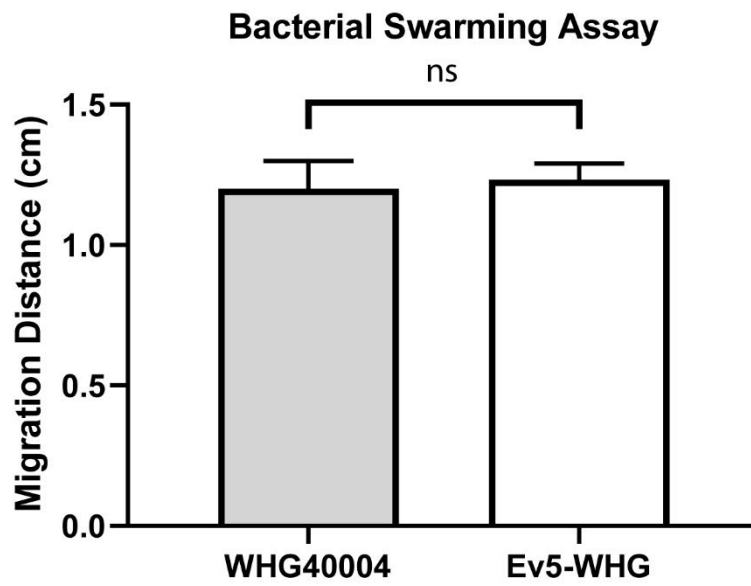

(B)

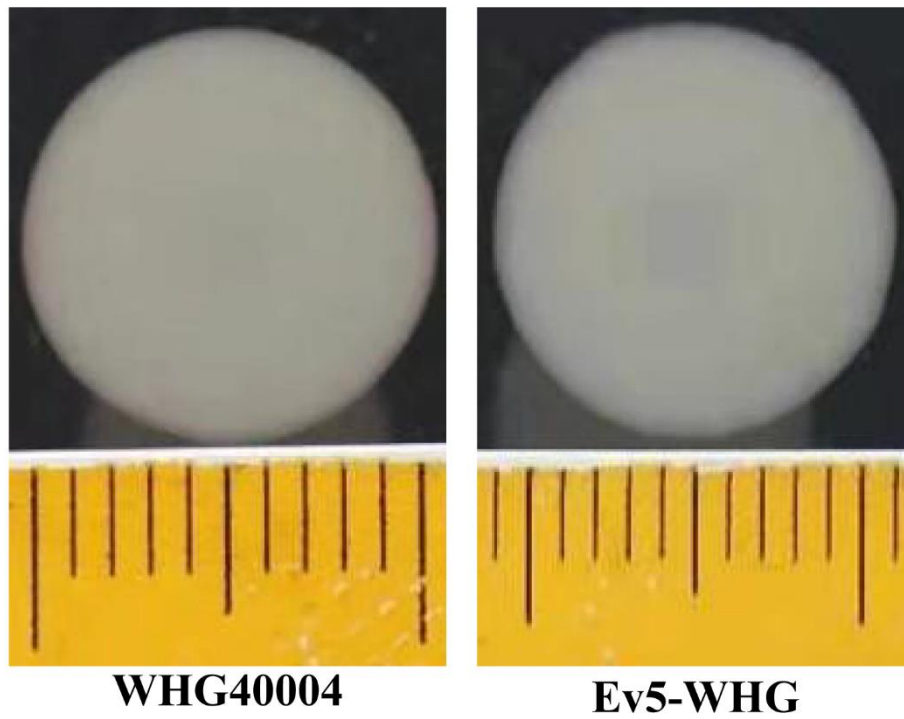

1

2

3

**Figure S1A-B:** Bacterial swarming assay showing no difference in bacterial migration distance between mutant and WT bacteria. Data are expressed as mean  $\pm$  SEM ( $n = 2$ ). ns: not significant.

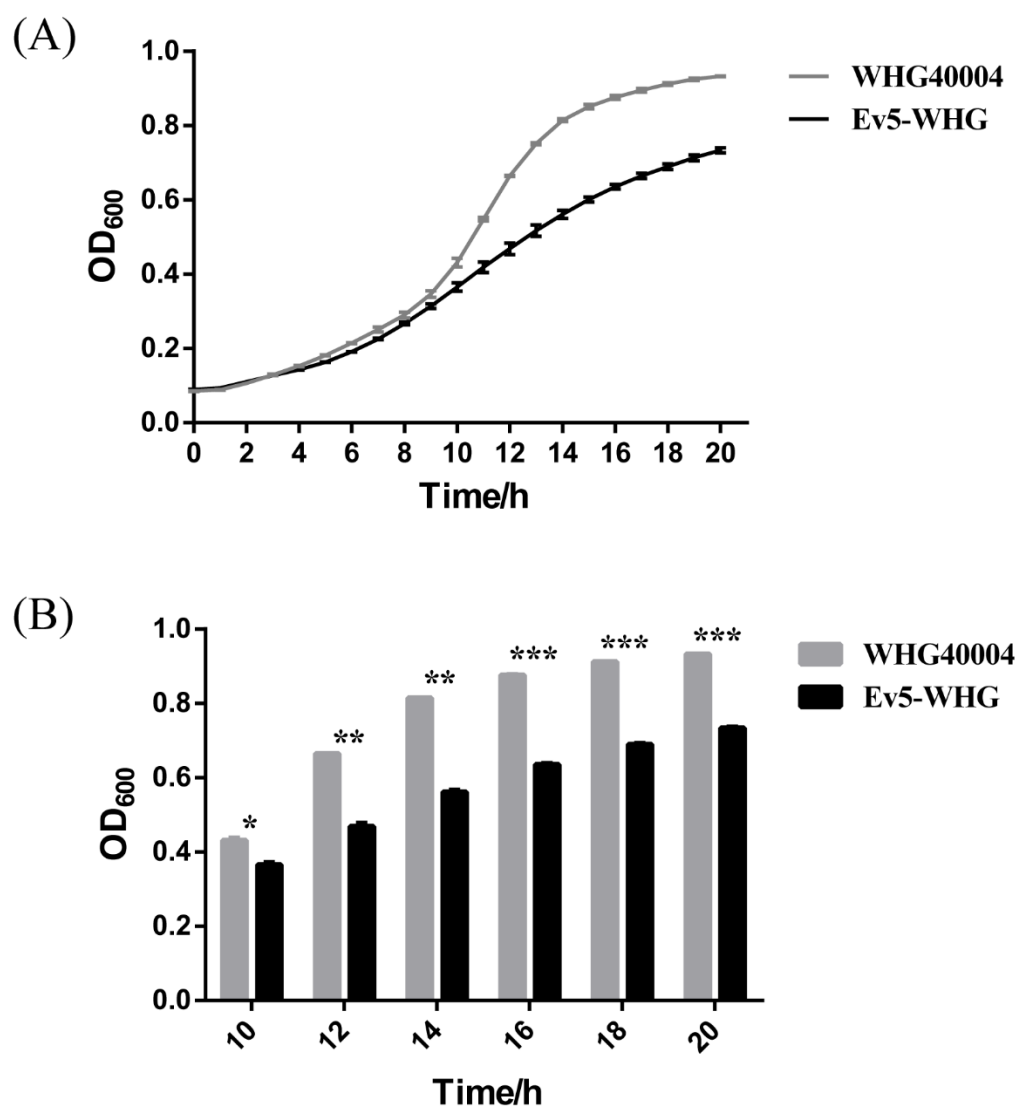

4

5 **Figure S2:** Growth curves of WHG40004 and Ev5-WHG. Error bars show average values and  
6 SD of three independent experiments. \*:  $p < 0.1$ ; \*\*:  $p < 0.01$ ; \*\*\*:  $p < 0.001$ .
